# Supplementary material for: Early intervention with a glycerol throat spray containing cold-adapted cod trypsin after self-diagnosis of the common cold: a randomised prospective, parallel group and single-blind methods trial (Glycerol-cod trypsin spray in common cold)
Source: bioRxiv or medRxiv preprint supplement (doi:10.1101/2021.10.11.21264744), 2021-10-14
Supplement: Supplementary file [file media-1.pdf]

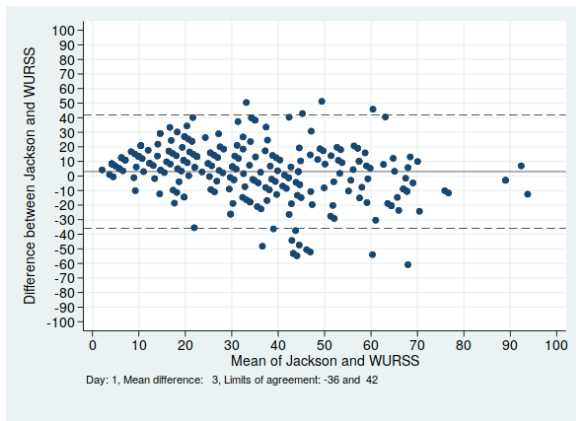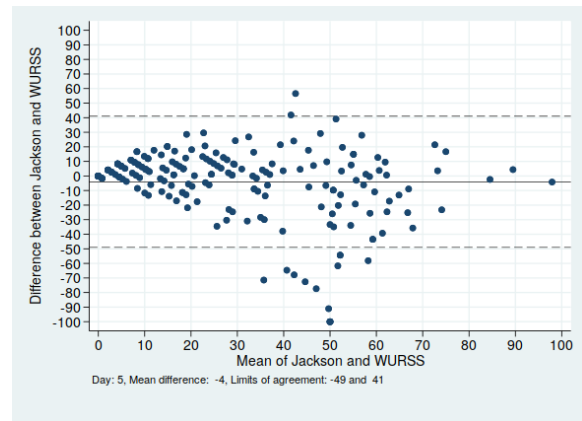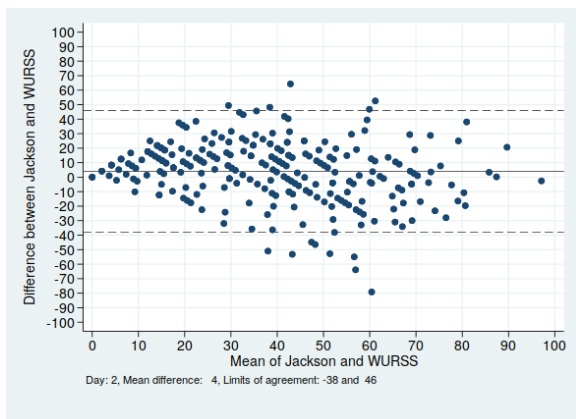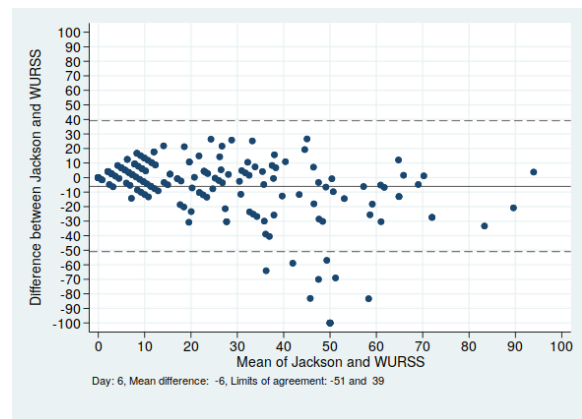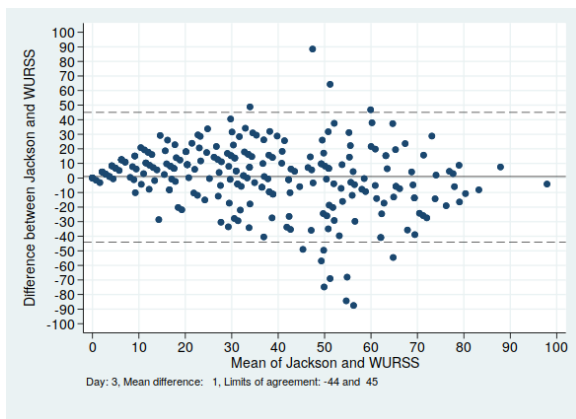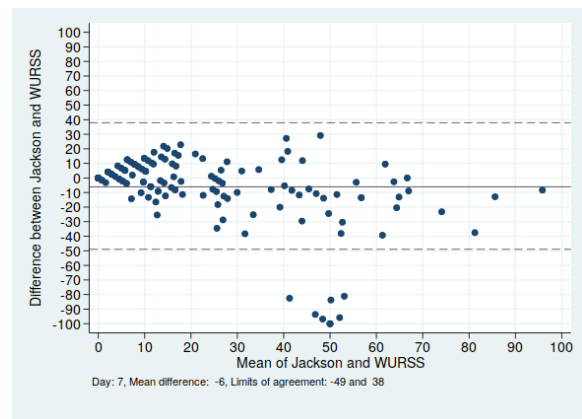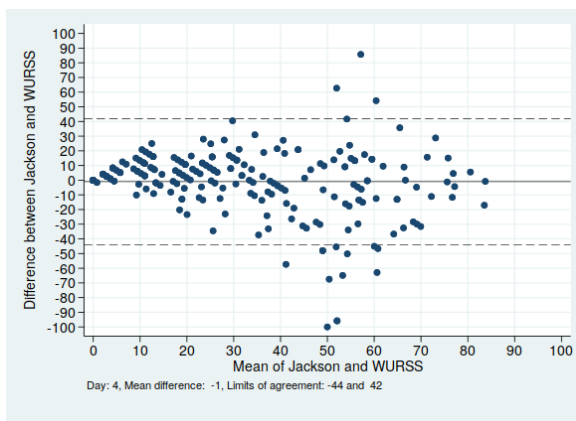

**Figure C: Comparison between Jackson score (evening) and 9-item WURSS-21 QoL domain day 1-7**
