# Supplementary material for: Early intervention with a glycerol throat spray containing cold-adapted cod trypsin after self-diagnosis of the common cold: a randomised prospective, parallel group and single-blind methods trial (Glycerol-cod trypsin spray in common cold)
Source: bioRxiv or medRxiv preprint supplement (doi:10.1101/2021.10.11.21264744), 2021-10-14
Supplement: Supplementary file [file media-2.pdf]

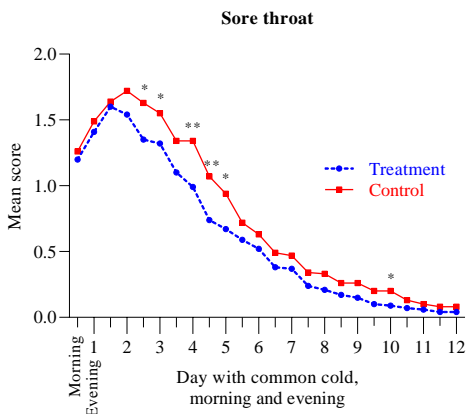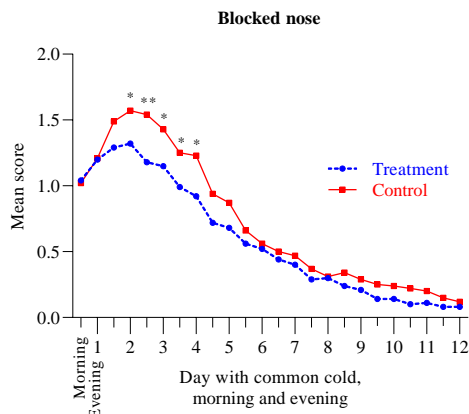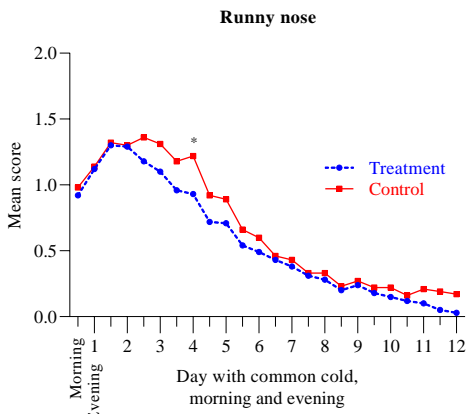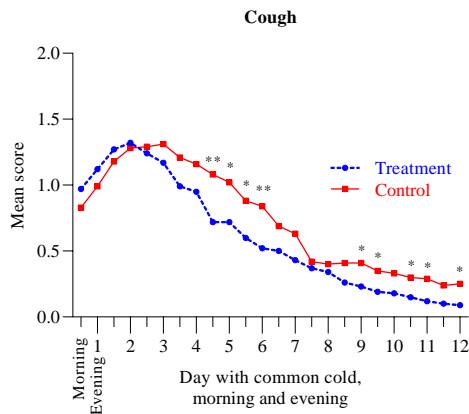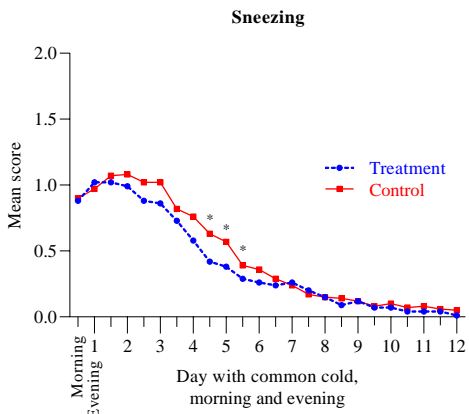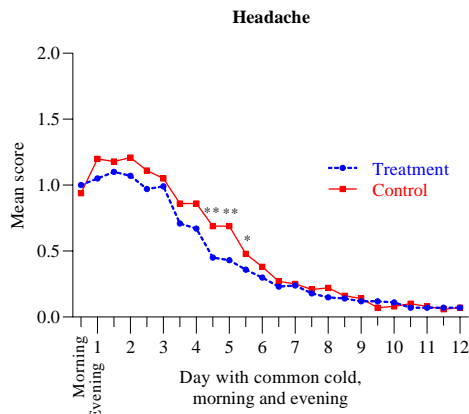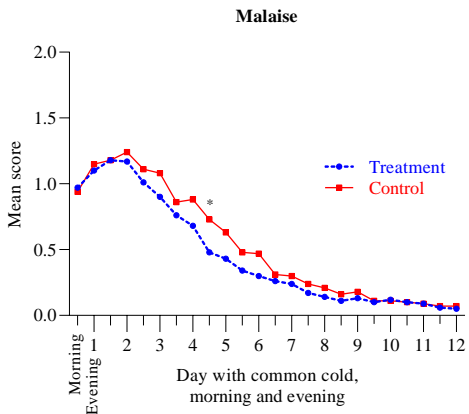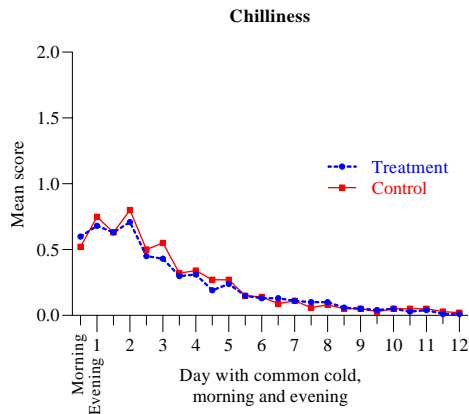

Figure A: Jackson score individual items morning and evening day 1-12
