# Supplementary material for: Early intervention with a glycerol throat spray containing cold-adapted cod trypsin after self-diagnosis of the common cold: a randomised prospective, parallel group and single-blind methods trial (Glycerol-cod trypsin spray in common cold)
Source: bioRxiv or medRxiv preprint supplement (doi:10.1101/2021.10.11.21264744), 2021-10-14
Supplement: Supplementary file [file media-3.pdf]

WURSS-21 QoL item 12  
Think clearly

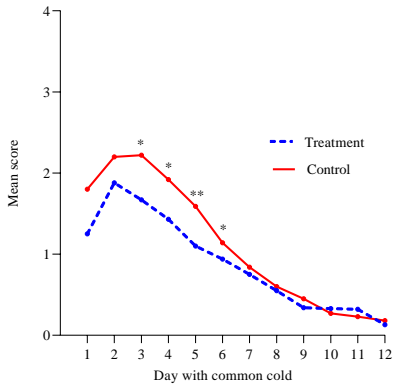

WURSS-21 QoL item 13  
Sleep well

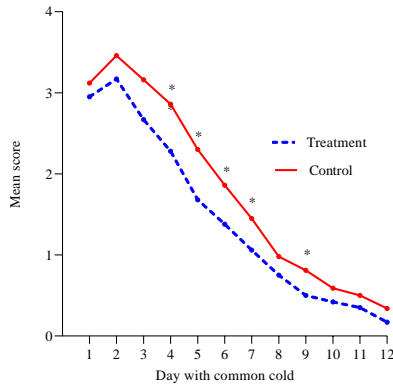

WURSS-21 QoL item 14  
Breathe easily

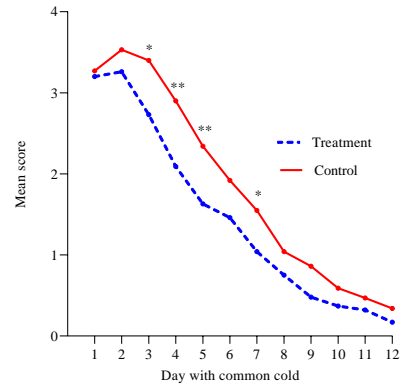

WURSS-21 QoL item 15  
Walk, climb stairs, exercise

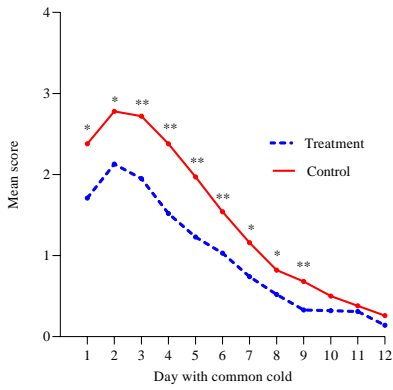

WURSS-21 QoL item 16  
Accomplish daily activities

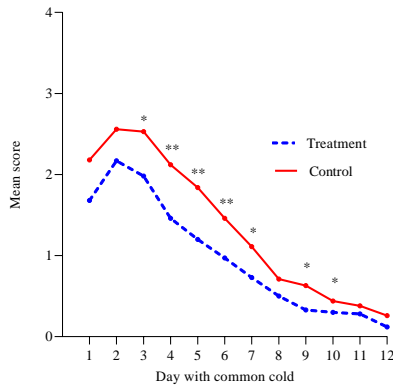

WURSS-21 QoL item 17  
Work outside the home

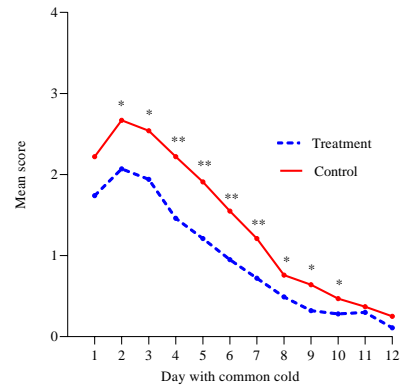

WURSS-21 QoL item 18  
Work inside the home

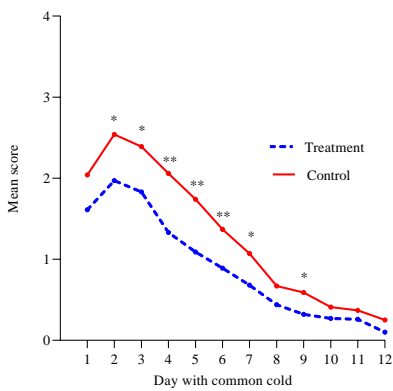

WURSS-21 QoL item 19  
Interact with others

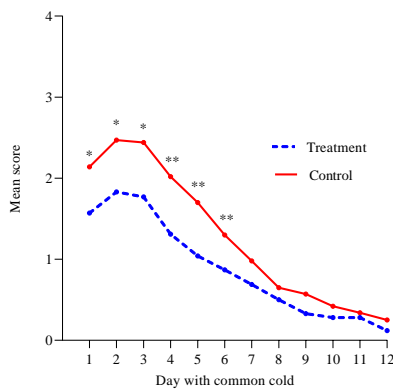

WURSS-21 QoL item 20  
Live your personal life

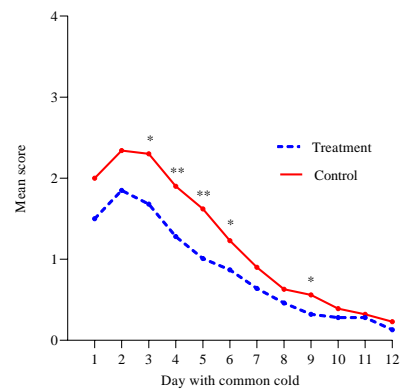

Figure B: 9-item WURSS-21 QoL domain individual items: Daily mean score day 1-12
